# Supplementary material for: Interpreting Sequence Variation in PDAC-Predisposing Genes Using a Multi-Tier Annotation Approach Performed at the Gene, Patient, and Cohort Level
Source: Front Oncol. 2021 Mar 5;11:606820. doi: 10.3389/fonc.2021.606820 (PMC7973372; doi:10.3389/fonc.2021.606820)
Supplement: Supplementary file 2 [file DataSheet_2.xlsx]

## Sheet: Table S1
Supplemental Table S1: Median coverage of sequencing across all samples per gene
Gene	Median coverage	Median deviation	% target overlap of coding
APC	297.09	82.15	100
ATM	290.19	80.96	100
AXIN2	309.3	85.07	100
BARD1	270.83	76.67	100
BMPR1A	345.43	104.87	100
BRCA1	294.39	83.73	100
BRCA2	346.84	98.04	100
BRIP1	332.34	96.48	100
BUB1B	340.32	98.23	100
CDH1	310.3	86.69	100
CDK4	417.17	116.43	100
CDKN2A	312.45	87.08	100
CFTR	284.39	80.76	100
CHEK2	284.67	83.97	100
CPA1	357.85	99.9	100
CTRC	353.53	94.66	100
DICER1	308.36	86.63	100
EPCAM	218.31	66.46	100
FANCC	268.23	79.18	100
FANCG	361.77	99.27	100
GREM1	233.82	64.41	100
KIT	309.3	88.83	100
MEN1	309.05	113.07	100
MLH1	257.35	76.87	100
MRE11A	316.79	94.39	100
MSH2	285.3	80.37	100
MSH6	296.55	77.19	100
MUTYH	317.75	91.4	100
NBN	300.13	93.46	100
NF1	308.6	92.74	100
PALB2	321.89	88.49	100
PALLD	279.82	81.19	100
PDGFRA	304.19	82.48	100
PMS2	291.55	80.54	100
POLD1	361.76	103.76	100
POLE	421.5	113.62	100
PRSS1	169.35	55.47	100
PTEN	407.48	108.21	100
RAD50	326.88	94.85	100
RAD51C	306.31	85.39	100
RAD51D	397.14	102.64	100
SDHA	302.45	85.68	96.84
SDHB	265.17	77.17	100
SDHC	269.95	74.39	100
SDHD	311.11	90.09	100
SMAD4	311.65	87.4	100
SMARCA4	344.41	88.53	100
SPINK1	330.91	91.45	100
STK11	170.14	70.74	100
TP53	350.7	97.24	100
TSC1	311.66	89.15	100
TSC2	374.24	110.14	100
VHL	362.39	93.63	100
Overall Median Coverage	309.22	88.49

## Sheet: Table S2
Supplemental Table S2: Somatic VUS, variants annotated in somatic disease only
Variant	Gene	Coding impact (Variant type)	Histology subtype1 (COSMIC)	Primary histology (COSMIC)	DISEASE (TCGA)
11:111959653_G/T	SDHD	missense_variant	.	.	ESCA
12:133250250_G/T	POLE	missense_variant	endometrioid carcinoma	carcinoma	UCEC
14:95557687_C/T	DICER1	missense_variant	astrocytoma grade IV; glioblastoma multiforme	glioma
14:95557691_A/G	DICER1	synonymous_variant	.	.	UCEC
14:95566107_AC/A	DICER1	intron_variant	.	haemangioblastoma
15:33023482_G/A	GREM1	3_prime_UTR_variant	.	.	CESC
15:40512802_C/T	BUB1B	missense_variant	squamous cell carcinoma	carcinoma
16:2137924_TCCCTGCAGTGCAGGAAAGGTAGGGCCGGGTGGGG/T	TSC2	intron_variant	adenocarcinoma	carcinoma
17:29528446_T/A	NF1	missense_variant	.	.	DLBC
17:56809976_A/G	RAD51C	intron_variant	.	.	UCEC
17:7573897_T/A	TP53	intron_variant	squamous cell carcinoma	carcinoma
19:50912817_G/A	POLD1	missense_variant	adenocarcinoma	carcinoma	COAD
19:50917060_C/T	POLD1	missense_variant	adenocarcinoma	carcinoma	UCEC
19:50918998_C/T	POLD1	missense_variant	.	.	UCEC
2:215593362_G/A	BARD1	3_prime_UTR_variant	.	.	UCEC
2:215645502_GTGGTGAAGAACATTCAGGCAA/G	BARD1	conservative_inframe_deletion	.	carcinoid-endocrine tumour
2:48026796_G/T	MSH6	synonymous_variant	.	.	LUAD
4:169432922_C/T	PALLD	synonymous_variant	mixed intestinal and diffuse adenocarcinoma-unclassifiable	carcinoma
4:55124984_G/A	PDGFRA	missense_variant&splice_region_variant	adenocarcinoma	carcinoma
4:55156540_C/T	PDGFRA	missense_variant	.	.	LIHC
4:55161445_G/A	PDGFRA	3_prime_UTR_variant	.	.	UCEC;STAD
4:55524246_C/T	KIT	missense_variant&splice_region_variant	acute myeloid leukaemia	haematopoietic neoplasm
5:112154867_C/T	APC	missense_variant	adenocarcinoma	carcinoma
7:117176623_C/T	CFTR	synonymous_variant	.	malignant melanoma
7:130020366_G/A	CPA1	missense_variant	.	.	ACC
7:130021011_G/A	CPA1	synonymous_variant	endometrioid carcinoma	carcinoma	UCEC
7:130021012_C/T	CPA1	missense_variant	.	.	LUAD
7:130021483_C/T	CPA1	missense_variant	adenocarcinoma	carcinoma	UCEC
7:130025721_C/T	CPA1	synonymous_variant	.	Ewings sarcoma-peripheral primitive neuroectodermal tumour
7:142460381_G/C	PRSS1	missense_variant	.	.	OV
9:135781194_G/A	TSC1	missense_variant	desmoplastic	malignant melanoma
9:135804238_C/T	TSC1	missense_variant	.	carcinoma
9:21968159_G/A	CDKN2A	3_prime_UTR_variant	squamous cell carcinoma	carcinoma
9:21968199_C/G	CDKN2A	3_prime_UTR_variant	squamous cell carcinoma	carcinoma

## Sheet: Table S3
Supplemental Table S3: Number of variants (coding and non-coding) identified in each gene sequenced.
Gene	Coding Variants	% Coding	Non-Coding Variants	% Non-Coding	TOTAL
APC	43	31.16	95	68.84	138
ATM	77	20.98	290	79.02	367
AXIN2	22	30.56	50	69.44	72
BARD1	21	20.79	80	79.21	101
BMPR1A	5	9.62	47	90.38	52
BRCA1	35	25	105	75	140
BRCA2	76	36.19	134	63.81	210
BRIP1	20	18.52	88	81.48	108
BUB1B	22	22.22	77	77.78	99
CDH1	8	7.48	99	92.52	107
CDK4	9	33.33	18	66.67	27
CDKN2A	8	17.39	38	82.61	46
CFTR	47	26.7	129	73.3	176
CHEK2	19	23.46	62	76.54	81
CPA1	16	23.88	51	76.12	67
CTRC	5	7.81	59	92.19	64
DICER1	12	8.45	130	91.55	142
EPCAM	10	15.15	56	84.85	66
FANCC	10	15.87	53	84.13	63
FANCG	16	34.04	31	65.96	47
GREM1	1	7.14	13	92.86	14
KIT	22	20.75	84	79.25	106
MEN1	11	12.36	78	87.64	89
MLH1	11	7.69	132	92.31	143
MRE11A	15	16.13	78	83.87	93
MSH2	14	12.73	96	87.27	110
MSH6	31	24.6	95	75.4	126
MUTYH	16	20.51	62	79.49	78
NBN	16	17.98	73	82.02	89
NF1	29	7.75	345	92.25	374
PALB2	29	39.19	45	60.81	74
PALLD	19	16.52	96	83.48	115
PDGFRA	22	14.57	129	85.43	151
PMS2	43	35.54	78	64.46	121
POLD1	28	12.79	191	87.21	219
POLE	50	12.32	356	87.68	406
PRSS1	3	6.25	45	93.75	48
PTEN	3	5.36	53	94.64	56
RAD50	20	15.87	106	84.13	126
RAD51C	7	18.92	30	81.08	37
RAD51D	4	6.56	57	93.44	61
SDHA	14	9.79	129	90.21	143
SDHB	4	12.12	29	87.88	33
SDHC	4	10.81	33	89.19	37
SDHD	9	32.14	19	67.86	28
SMAD4	4	8.51	43	91.49	47
SMARCA4	7	2.87	237	97.13	244
SPINK1	6	17.14	29	82.86	35
STK11	11	15.07	62	84.93	73
TP53	6	13.95	37	86.05	43
TSC1	15	13.76	94	86.24	109
TSC2	33	10.09	294	89.91	327
VHL	5	15.15	28	84.85	33

## Sheet: Table S4
Supplemental Table S4: Variant annotations based on subtypes of coding and non-coding effect ontology identified by SnpEff
CODING Variant Types	Pathogenic	Reported VUS	Novel VUS	Benign	Other	Not Evaluated	Total
conservative_inframe_deletion	0	2	1	0	0	1	4
conservative_inframe_insertion	1	0	3	0	0	0	4
disruptive_inframe_deletion	1	6	1	2	0	0	10
disruptive_inframe_deletion&splice_region_variant	0	0	1	0	0	0	1
frameshift_variant	18	4	39	0	0	0	61
frameshift_variant&splice_acceptor_variant&splice_region_variant&intron_variant	0	0	1	0	0	0	1
frameshift_variant&splice_region_variant	0	0	3	0	0	0	3
missense_variant	9	479	140	126	1	16	771
missense_variant&splice_region_variant	1	12	6	0	0	2	21
sequence_feature	0	0	12	5	0	0	17
splice_acceptor_variant&intron_variant	4	1	2	0	0	0	7
splice_donor_variant&intron_variant	5	0	3	0	0	0	8
start_lost	1	0	0	0	0	0	1
stop_gained	18	4	2	0	0	0	24
structural_interaction_variant	1	24	15	20	0	0	60
TOTAL	59	532	229	153	1	19	993
	0.0594159	0.53575	0.230614	0.154079	0.00100705	0.0191339	1
NON-CODING Variant Types	Pathogenic	Reported VUS	Novel VUS	Benign	Other	Not Evaluated	Total
3_prime_UTR_variant	0	8	95	24	0	5	132
5_prime_UTR_premature_start_codon_gain_variant	0	4	8	3	0	0	15
5_prime_UTR_variant	2	16	48	16	0	0	82
downstream_gene_variant	1	1	12	0	0	0	14
initiator_codon_variant	0	1	0	0	0	0	1
intragenic_variant	0	0	3	3	0	0	6
intron_variant	10	115	3325	389	4	4	3847
sequence_feature	0	1	66	8	0	0	75
splice_region_variant	0	2	2	0	0	0	4
splice_region_variant&intron_variant	2	41	63	75	0	0	181
splice_region_variant&synonymous_variant	0	4	3	7	0	0	14
synonymous_variant	0	67	58	419	0	6	550
TF_binding_site_variant	0	0	18	1	0	0	19
upstream_gene_variant	1	1	23	3	0	0	28
TOTAL	16	261	3724	948	4	15	4968
	0.00322061	0.0525362	0.749597	0.190821	0.000805153	0.00301932	1

## Sheet: Table S5
Supplemental Table S5: Identification of 75 pathogenic variants in the germline sequence of the patient cohort
Annotation	Gene	Impact	Variant Type	HGVS.c	HGVS.p	ClinVar	ClinVar Phenotype	ClinVar Class	HGMD Phenotype	HGMD Class	Sample (n)	Population Frequency	Cohort Frequency	Frequency Ratio	Fischer's Exact Test p-value
ENST00000278616	ATM	HIGH	stop_gained	c.1178G>A	p.Trp393*	.	.	Pathogenic	.	.	1	NA	0.0009311	NA	NA
ENST00000278616	ATM	HIGH	stop_gained	c.1339C>T	p.Arg447*	.	Hereditary cancer-predisposing syndrome,Ataxia-telangiectasia syndrome,not provided	Pathogenic/Likely pathogenic	Ataxia_telangiectasia	DM	1	8.1277e-06	0.0009294	114.35	0.0130043
ENST00000278616	ATM	HIGH	frameshift_variant	c.1368dupA	p.Arg457fs	.	.	.	Breast_cancer_increased_risk	DM	1	NA	0.0009294	NA	NA
ENST00000278616	ATM	HIGH	frameshift_variant	c.1564_1565delGA	p.Glu522fs	.	.	Pathogenic	Ataxia_telangiectasia	DM	2	5.28382e-05	0.001859	35.1829	0.00191551
ENST00000278616	ATM	HIGH	splice_donor_variant&intron_variant	c.1898+2T>G		.	Hereditary cancer-predisposing syndrome,not provided	Pathogenic/Likely pathogenic	Ataxia_telangiectasia	DM	1	4.0865e-06	0.0009294	227.432	0.00873651
ENST00000278616	ATM	HIGH	splice_donor_variant&intron_variant	c.2376+1G>T		.	not provided	Pathogenic	Malignant_neoplasm	DM	1	NA	0.0009294	NA	NA
ENST00000278616	ATM	HIGH	frameshift_variant	c.3231dupT	p.Leu1078fs	.	.	Likely pathogenic	.	.	1	NA	0.0009294	NA	NA
ENST00000278616	ATM	HIGH	frameshift_variant	c.3712_3716delTTATT	p.Leu1238fs	.	.	Pathogenic/Likely pathogenic	Ataxia_telangiectasia	DM	1	NA	0.0009294	NA	NA
ENST00000278616	ATM	HIGH	frameshift_variant	c.4143dupT	p.Pro1382fs	.	.	Pathogenic	Ataxia_telangiectasia	DM	1	NA	0.0009294	NA	NA
ENST00000278616	ATM	HIGH	splice_donor_variant&intron_variant	c.5319+2T>C		.	.	Likely pathogenic	Ataxia_telangiectasia	DM	1	NA	0.0009294	NA	NA
ENST00000278616	ATM	HIGH	splice_donor_variant&intron_variant	c.5762+1G>T		.	Hereditary cancer-predisposing syndrome,Ataxia-telangiectasia syndrome	Likely pathogenic	.	.	1	NA	0.0009294	NA	NA
ENST00000278616	ATM	HIGH	splice_acceptor_variant&intron_variant	c.7630-2A>C		loss of function	Hereditary cancer-predisposing syndrome,Ataxia-telangiectasia syndrome,not provided	Pathogenic	Ataxia_telangiectasia	DM	1	1.44439e-05	0.0009294	64.3456	0.0192027
ENST00000278616	ATM	HIGH	stop_gained	c.8098A>T	p.Lys2700*	.	.	Likely pathogenic	Ataxia_telangiectasia	DM	1	NA	0.0009294	NA	NA
ENST00000278616	ATM	HIGH	stop_gained	c.9019G>T	p.Glu3007*	.	Hereditary cancer-predisposing syndrome,Ataxia-telangiectasia syndrome,not provided	Pathogenic/Likely pathogenic	Ataxia_telangiectasia	DM	1	NA	0.0009294	NA	NA
ENST00000471181	BRCA1	HIGH	frameshift_variant	c.2835dupT	p.Ile946fs	loss of function	.	Pathogenic	Breast_and/or_ovarian_cancer	DM	1	NA	0.0009294	NA	NA
ENST00000471181	BRCA1	HIGH	frameshift_variant	c.5329dupC	p.Gln1777fs	loss of function,gain of function	.	Pathogenic	Breast_cancer	DM	1	0.000162312	0.0009294	5.72601	0.163223
ENST00000471181	BRCA1	HIGH	frameshift_variant	c.68_69delAG	p.Glu23fs	loss of function	.	Pathogenic	Breast_cancer	DM	1	0.000198705	0.0009294	4.67728	0.195306
ENST00000544455	BRCA2	HIGH	stop_gained	c.1689G>A	p.Trp563*	loss of function	Breast-ovarian cancer%2C familial 2	Pathogenic	Breast_and/or_ovarian_cancer	DM	1	4.06461e-06	0.0009294	228.657	0.00869001
ENST00000544455	BRCA2	HIGH	frameshift_variant	c.2957delA	p.Asn986fs	loss of function	.	Pathogenic	Breast_cancer	DM	6	NA	0.005587	NA	NA
ENST00000544455	BRCA2	HIGH	frameshift_variant	c.3847_3848delGT	p.Val1283fs	loss of function	.	Pathogenic	Breast_cancer	DM	2	4.30763e-05	0.001862	43.2256	0.00136112
ENST00000544455	BRCA2	HIGH	frameshift_variant	c.4449delA	p.Asp1484fs	loss of function	.	Pathogenic	Breast_and/or_ovarian_cancer	DM	1	NA	0.0009294	NA	NA
ENST00000544455	BRCA2	HIGH	stop_gained	c.5682C>G	p.Tyr1894*	loss of function	Breast-ovarian cancer%2C familial 2,Hereditary breast and ovarian cancer syndrome,Hereditary cancer-predisposing syndrome,Ovarian cancer,not provided	Pathogenic	Ovarian_cancer	DM	1	4.07711e-06	0.0009294	227.956	0.00871655
ENST00000544455	BRCA2	HIGH	frameshift_variant	c.5946delT	p.Ser1982fs	loss of function,gain of function	.	Pathogenic	Breast_cancer	DM	1	0.000259948	0.0009294	3.57532	0.246538
ENST00000304494	CDKN2A	MODERATE	conservative_inframe_insertion	c.335_337dupGTC	p.Arg112dup	.	.	Pathogenic/Likely pathogenic	Melanoma	DM	1	1.27619e-05	0.0009294	72.8261	0.0181016
ENST00000304494	CDKN2A	MODIFIER	5_prime_UTR_variant	c.-33G>C		.	.	.	Colorectal_cancer_susceptibility_to	DM?	2	0.00120726	0.001859	1.53985	0.375045
ENST00000304494	CDKN2A	HIGH	frameshift_variant	c.47_50delTGGC	p.Leu16fs	.	.	Pathogenic	Melanoma	DM	1	NA	0.0009294	NA	NA
ENST00000003084	CFTR	MODIFIER	intron_variant	c.1117-26_1117-25delAT		More than 1%2C000 CFTR variants have been reported. Most common pathogenic variant is p.Phe508del.,loss of function	.	not provided	Cystic_fibrosis	DM	1	1.68563e-05	0.0009311	55.2375	0.0223667
ENST00000003084	CFTR	MODERATE	disruptive_inframe_deletion	c.1521_1523delCTT	p.Phe508del	More than 1%2C000 CFTR variants have been reported. Most common pathogenic variant is p.Phe508del.,loss of function	.	Pathogenic	Cystic_fibrosis	DM	16	0.00702934	0.015	2.13391	0.004931
ENST00000003084	CFTR	HIGH	splice_acceptor_variant&intron_variant	c.1585-1G>A		More than 1%2C000 CFTR variants have been reported. Most common pathogenic variant is p.Phe508del.,loss of function	Cystic fibrosis,not provided	Pathogenic	Cystic_fibrosis	DM	1	8.31694e-05	0.0009294	11.1748	0.0889922
1XMI:A_551-A_660:ENST00000003084	CFTR	HIGH	structural_interaction_variant	c.1652G>A		More than 1%2C000 CFTR variants have been reported. Most common pathogenic variant is p.Phe508del.,loss of function	Cystic fibrosis,Hereditary pancreatitis,ivacaftor response - Efficacy	Pathogenic	Cystic_fibrosis	DM	1	0.000184402	0.0009294	5.04008	0.18285
ENST00000003084	CFTR	HIGH	stop_gained	c.1657C>T	p.Arg553*	More than 1%2C000 CFTR variants have been reported. Most common pathogenic variant is p.Phe508del.,loss of function	Cystic fibrosis	Pathogenic	Cystic_fibrosis	DM	1	7.59477e-05	0.0009294	12.2374	0.0818994
ENST00000003084	CFTR	MODERATE	missense_variant	c.2057C>A	p.Ser686Tyr	.	.	.	Primary_sclerosing_cholangitis	DM	1	3.22914e-05	0.0009294	28.7817	0.0660311
ENST00000003084	CFTR	HIGH	stop_gained	c.2551C>T	p.Arg851*	More than 1%2C000 CFTR variants have been reported. Most common pathogenic variant is p.Phe508del.,loss of function	Cystic fibrosis	Pathogenic	Cystic_fibrosis	DM	1	NA	0.0009294	NA	NA
ENST00000003084	CFTR	MODERATE	missense_variant	c.350G>A	p.Arg117His	More than 1%2C000 CFTR variants have been reported. Most common pathogenic variant is p.Phe508del.,loss of function	Cystic fibrosis,Congenital bilateral absence of the vas deferens,not provided,Cystic fibrosis	Pathogenic	Cystic_fibrosis	DM	1	0.00143854	0.0009294	0.646073	0.787722
ENST00000003084	CFTR	HIGH	frameshift_variant	c.3528delC	p.Lys1177fs	More than 1%2C000 CFTR variants have been reported. Most common pathogenic variant is p.Phe508del.,loss of function	.	Pathogenic	Cystic_fibrosis	DM	1	0.000159158	0.0009311	5.85014	0.160392
ENST00000003084	CFTR	HIGH	stop_gained	c.3846G>A	p.Trp1282*	More than 1%2C000 CFTR variants have been reported. Most common pathogenic variant is p.Phe508del.,loss of function	Cystic fibrosis	Pathogenic	Cystic_fibrosis	DM	1	0.000193899	0.0009294	4.79322	0.212817
ENST00000003084	CFTR	MODERATE	missense_variant	c.3909C>G	p.Asn1303Lys	More than 1%2C000 CFTR variants have been reported. Most common pathogenic variant is p.Phe508del.,loss of function	Cystic fibrosis,not provided	Pathogenic	Cystic_fibrosis	DM	3	0.000130746	0.002793	21.362	0.000484171
ENST00000003084	CFTR	MODERATE	missense_variant	c.4264C>T	p.Arg1422Trp	.	.	.	Cystic_fibrosis	DM	1	3.26216e-05	0.0009294	28.4903	0.0386366
ENST00000348295	CHEK2	HIGH	stop_gained	c.85C>T	p.Gln29*	loss of function	Hereditary cancer-predisposing syndrome,Familial cancer of breast	Pathogenic/Likely pathogenic	.	.	1	NA	0.0009294	NA	NA
ENST00000011292	CPA1	HIGH	stop_gained	c.79C>T	p.Arg27*	.	.	.	Chronic_pancreatitis_early_onset	DM?	4	0.000435076	0.003717	8.54334	0.00147045
ENST00000375949	CTRC	MODIFIER	downstream_gene_variant	c.*86A>G		.	.	.	Pancreatitis_chronic	DM?	17	0.0097552	0.019	1.94768	0.00565033
ENST00000289081	FANCC	LOW	splice_region_variant&intron_variant	c.456+4A>T		.	.	Pathogenic	Fanconi_anaemia	DM	1	0.000263894	0.0009294	3.52187	0.249728
ENST00000378643	FANCG	HIGH	frameshift_variant	c.156dupG	p.Leu53fs	.	.	Pathogenic	Fanconi_anaemia	DM	1	1.28352e-05	0.0009294	72.4102	0.0182044
ENST00000443283	MEN1	MODERATE	missense_variant	c.974C>G	p.Pro325Arg	.	.	.	Multiple_endocrine_neoplasia_1	DM	1	NA	0.001176	NA	NA
ENST00000231790	MLH1	MODERATE	missense_variant	c.238T>G	p.Phe80Val	loss of function	Lynch syndrome	Pathogenic	Colorectal_cancer_non-polyposis	DM	1	NA	0.0009294	NA	NA
ENST00000231790	MLH1	LOW	splice_region_variant&intron_variant	c.677+3A>G		loss of function	.	Pathogenic	Colorectal_cancer_non-polyposis	DM	1	NA	0.0009294	NA	NA
ENST00000323929	MRE11A	HIGH	stop_gained	c.1714C>T	p.Arg572*	.	Ataxia-telangiectasia-like disorder,Hereditary cancer-predisposing syndrome	Pathogenic	Ataxia_telangiectasia-like_disease	DM	1	6.1386e-05	0.0009294	15.1403	0.0674228
ENST00000234420	MSH6	HIGH	splice_donor_variant&intron_variant	c.260+1G>C		.	.	Likely pathogenic	.	.	1	NA	0.0009294	NA	NA
ENST00000234420	MSH6	HIGH	splice_acceptor_variant&intron_variant	c.261-1G>C		.	not provided,Lynch syndrome,Hereditary cancer-predisposing syndrome	Pathogenic/Likely pathogenic	Breast_cancer	DM	1	NA	0.0009294	NA	NA
ENST00000234420	MSH6	MODIFIER	intron_variant	c.3557-144G>A		.	.	.	Lynch_syndrome	DM?	476	0.713675	0.67	0.938803	0.999042
ENST00000234420	MSH6	MODIFIER	intron_variant	c.3557-185C>T		.	.	.	Lynch_syndrome	DM?	92	0.0820123	0.09	1.0974	0.213303
ENST00000450313	MUTYH	MODIFIER	intron_variant	c.1187-27C>T		.	.	.	MUTYH-associated_polyposis	DM?	5	0.00355208	0.004647	1.30825	0.337205
ENST00000450313	MUTYH	MODERATE	missense_variant&splice_region_variant	c.1187G>A	p.Gly396Asp	gain of function	MYH-associated polyposis,Endometrial carcinoma,not provided,Hereditary cancer-predisposing syndrome,Carcinoma of colon	Pathogenic/Likely pathogenic	Adenomatous_polyposis_coli	DM	6	0.0029844	0.005576	1.86838	0.107229
ENST00000450313	MUTYH	MODIFIER	intron_variant	c.1477-28G>A		.	.	.	MUTYH-associated_polyposis	DM?	1	0.000537245	0.0009294	1.72994	0.440812
ENST00000450313	MUTYH	MODIFIER	intron_variant	c.388+56G>A		.	.	.	MUTYH-associated_polyposis	DM?	3	0.00187496	0.002788	1.48697	0.337199
ENST00000450313	MUTYH	MODERATE	missense_variant	c.536A>G	p.Tyr179Cys	gain of function	MYH-associated polyposis,Endometrial carcinoma,not provided,Hereditary cancer-predisposing syndrome,Carcinoma of colon	Pathogenic	Adenomatous_polyposis_coli	DM	4	0.00148641	0.003717	2.50066	0.0794922
ENST00000450313	MUTYH	MODIFIER	intron_variant	c.690+21C>A		.	.	.	MUTYH-associated_polyposis	DM?	9	0.00741709	0.008364	1.12767	0.405307
ENST00000265433	NBN	HIGH	stop_gained	c.127C>T	p.Arg43*	.	Hereditary cancer-predisposing syndrome	Pathogenic/Likely pathogenic	Cancer	DM	1	3.24944e-05	0.0009294	28.6019	0.0384892
ENST00000265433	NBN	HIGH	splice_acceptor_variant&intron_variant	c.995-2A>G		.	Hereditary cancer-predisposing syndrome,Microcephaly%2C normal intelligence and immunodeficiency	Pathogenic/Likely pathogenic	Ovarian_cancer	DM	1	4.06359e-06	0.0009294	228.714	0.00868783
ENST00000261584	PALB2	HIGH	start_lost	c.2T>C	p.Met1?	loss of function	.	Likely pathogenic	.	.	1	4.1437e-06	0.0009294	224.292	0.00885798
ENST00000261584	PALB2	HIGH	stop_gained	c.3549C>A	p.Tyr1183*	loss of function	Hereditary cancer-predisposing syndrome,Familial cancer of breast,not provided	Pathogenic	Fanconi_anaemia_N_type	DM	1	4.06161e-06	0.0009294	228.826	0.00868363
ENST00000261584	PALB2	HIGH	frameshift_variant	c.509_510delGA	p.Arg170fs	loss of function	.	Pathogenic	Breast_cancer	DM	1	3.2491e-05	0.0009294	28.6048	0.0384852
ENST00000261584	PALB2	HIGH	stop_gained	c.751C>T	p.Gln251*	loss of function	Familial cancer of breast,Hereditary cancer-predisposing syndrome	Pathogenic	Breast_cancer	DM	1	NA	0.0009294	NA	NA
ENST00000265849	PMS2	HIGH	frameshift_variant	c.116delT	p.Val39fs	.	.	Pathogenic	.	.	9	NA	0.046	NA	NA
ENST00000265849	PMS2	MODIFIER	intron_variant	c.23+72C>T		.	.	.	Lynch_syndrome	DM?	200	0.231754	0.213	0.919078	0.932222
ENST00000265849	PMS2	MODIFIER	intron_variant	c.537+187A>G		.	.	.	Lynch_syndrome	DM?	140	0.157573	0.146	0.926555	0.877274
ENST00000265849	PMS2	HIGH	stop_gained	c.631C>T	p.Arg211*	.	not provided	Pathogenic	Colorectal_cancer	DM?	1	NA	0.0009294	NA	NA
ENST00000311737	PRSS1	MODIFIER	upstream_gene_variant	c.-204A>C		.	.	.	Pancreatitis_chronic_protection_against	DFP	434	0.57216	0.557	0.973504	0.850324
ENST00000378823	RAD50	HIGH	frameshift_variant	c.1748delA	p.Lys583fs	.	.	Pathogenic	.	.	3	0.000120922	0.002788	23.0562	0.000393452
ENST00000378823	RAD50	MODIFIER	5_prime_UTR_variant	c.-92_-89delCAGA		.	.	Pathogenic	Breast_cancer	DM	1	3.24872e-05	0.0009294	28.6082	0.0380239
ENST00000264932	SDHA	HIGH	stop_gained	c.1151C>G	p.Ser384*	.	Hereditary cancer-predisposing syndrome	Pathogenic	Gastrointestinal_tumour_stromal	DM	1	8.12777e-06	0.0009311	114.558	0.0130044
ENST00000375499	SDHB	MODIFIER	intron_variant	c.73-29delT		.	.	.	Phaeochromocytoma	DM?	13	0.000373866	0.012	32.0971	1.76627e-15
ENST00000367975	SDHC	HIGH	stop_gained	c.397C>T	p.Arg133*	.	Hereditary cancer-predisposing syndrome,Gastrointestinal stromal tumor,Paragangliomas 3	Pathogenic	Paraganglioma	DM	1	3.27606e-05	0.0009311	28.4213	0.0383371
ENST00000375549	SDHD	MODERATE	missense_variant	c.305A>G	p.His102Arg	.	.	.	Paraganglioma	DM	2	4.06065e-06	0.002037	501.644	5.65573e-05
ENST00000269305	TP53	MODERATE	missense_variant	c.743G>A	p.Arg248Gln	gain of function	Li-Fraumeni syndrome 1,Sarcoma,Li-Fraumeni syndrome 2,Li-Fraumeni syndrome,not provided	Pathogenic/Likely pathogenic	Sarcoma	DM	2	2.03047e-05	0.001859	91.5552	0.000391398
HGVS: Human Genome Variation Society

## Sheet: Table S6
Supplemental Table S6: CFTR coding variants (non-benign) seen in more than 1 patient in our cohort
Gene	HGVS.c	HGVS.p	Sample (n)	Population Frequency	Variant Classification	Fischer's Exact Test p-value
CFTR	c.1521_1523delCTT	p.Phe508del	16	0.007029	Pathogenic	0.004931
CFTR	c.3909C>G	p.Asn1303Lys	3	0.000131	Pathogenic	0.000484171
CFTR	c.1408G>A	p.Val470Met	367	0.48639	Reported VUS	0.998815
CFTR	c.1523T>G	p.Phe508Cys	4	0.000915	Reported VUS	0.0184998
CFTR	c.1727G>C		12	0.004978	Reported VUS	0.00908751
CFTR	c.2002C>T		14	0.005909	Reported VUS	0.00589457
CFTR	c.224G>A	p.Arg75Gln	29	0.015563	Reported VUS	0.00388233
CFTR	c.2260G>A	p.Val754Met	3	0.001795	Reported VUS	0.305734
CFTR	c.2991G>C	p.Leu997Phe	3	0.002209	Reported VUS	0.425152
CFTR	c.3154T>G	p.Phe1052Val	2	0.000608	Reported VUS	0.14172
CFTR	c.3485G>T	p.Arg1162Leu	4	0.000677	Reported VUS	0.0068272
CFTR	c.3705T>G	p.Ser1235Arg	5	0.004993	Reported VUS	0.622999
CFTR	c.91C>T	p.Arg31Cys	2	0.001616	Reported VUS	0.519602
CFTR	c.1209+2T>A		6	NA	Novel VUS	NA
CFTR	c.1819delA	p.Met607fs	2	NA	Novel VUS	NA
CFTR	c.2647_2650delCTCC	p.Leu884fs	2	NA	Novel VUS	NA

## Sheet: Table S7
Supplemental Table S6: ATM coding variants (non-benign) seen in more than 1 patient in our cohort
Gene	HGVS.c	HGVS.p	Sample (n)	Population Frequency	Variant Classification	Fischer's Exact Test p-value
ATM	c.1564_1565delGA	p.Glu522fs	2	5.28e-05	Pathogenic	0.00191551
ATM	c.1229T>C	p.Val410Ala	3	0.002102	Reported VUS	0.394802
ATM	c.146C>G	p.Ser49Cys	6	0.00724	Reported VUS	0.789662
ATM	c.1541G>A	p.Gly514Asp	4	0.005785	Reported VUS	0.868339
ATM	c.1636C>G	p.Leu546Val	4	0.004837	Reported VUS	0.7632
ATM	c.1810C>T	p.Pro604Ser	5	0.003214	Reported VUS	0.267524
ATM	c.2119T>C	p.Ser707Pro	10	0.007996	Reported VUS	0.360939
ATM	c.2572T>C	p.Phe858Leu	16	0.008561	Reported VUS	0.0262332
ATM	c.2614C>T	p.Pro872Ser	2	0.004373	Reported VUS	0.948589
ATM	c.3118A>G	p.Met1040Val	2	0.003952	Reported VUS	0.797048
ATM	c.3161C>G	p.Pro1054Arg	27	0.016284	Reported VUS	0.0205566
ATM	c.320G>A	p.Cys107Tyr	3	0.000214	Reported VUS	0.0018562
ATM	c.334G>A	p.Ala112Thr	3	0.000268	Reported VUS	0.00344331
ATM	c.3383A>G	p.Gln1128Arg	5	0.002173	Reported VUS	0.0888694
ATM	c.378T>A	p.Asp126Glu	12	0.020174	Reported VUS	0.983247
ATM	c.3925G>A	p.Ala1309Thr	2	0.00069	Reported VUS	0.172057
ATM	c.4138C>T	p.His1380Tyr	8	0.013124	Reported VUS	0.971031
ATM	c.4258C>T	p.Leu1420Phe	13	0.011274	Reported VUS	0.439464
ATM	c.4362A>C	p.Lys1454Asn	2	0.000303	Reported VUS	0.0441687
ATM	c.4388T>G	p.Phe1463Cys	2	0.001462	Reported VUS	0.467474
ATM	c.4424A>G	p.Tyr1475Cys	2	0.000551	Reported VUS	0.12092
ATM	c.5071A>C	p.Ser1691Arg	5	0.00178	Reported VUS	0.0458388
ATM	c.544G>C	p.Val182Leu	3	0.002972	Reported VUS	0.620381
ATM	c.5557G>A	p.Asp1853Asn	142	0.114251	Reported VUS	0.00298516
ATM	c.5558A>T	p.Asp1853Val	8	0.004915	Reported VUS	0.16548
ATM	c.6067G>A	p.Gly2023Arg	4	0.001432	Reported VUS	0.0716697
ATM	c.6995T>C	p.Leu2332Pro	2	0.00578	Reported VUS	0.985131
ATM	c.7313C>T	p.Thr2438Ile	3	0.000192	Reported VUS	0.00137905
ATM	c.998C>T	p.Ser333Phe	2	0.001585	Reported VUS	0.509413
ATM	c.1236-3dupT		287	0.388294	Novel VUS	1
ATM	c.1499T>C	p.Ile500Thr	2	NA	Novel VUS	NA
ATM	c.4139A>C	p.His1380Pro	2	NA	Novel VUS	NA
ATM	c.5023T>G	p.Leu1675Val	5	NA	Novel VUS	NA
ATM	c.6544C>G	p.Leu2182Val	4	NA	Novel VUS	NA

## Sheet: Table S8
Supplemental Table S8: BRCA2 coding variants (non-benign) seen in more than 1 patient in our cohort
Gene	HGVS.c	HGVS.p	Sample (n)	Population Frequency	Variant Classification	Fischer's Exact Test p-value
BRCA2	c.2957delA	p.Asn986fs	6	NA	Pathogenic	NA
BRCA2	c.3847_3848delGT	p.Val1283fs	2	4.31e-05	Pathogenic	0.00136112
BRCA2	c.10234A>G	p.Ile3412Val	4	0.0246	Reported VUS	1
BRCA2	c.1114A>C	p.Asn372His	256	0.273	Reported VUS	0.322311
BRCA2	c.1964C>G	p.Pro655Arg	2	0.000882	Reported VUS	0.246819
BRCA2	c.2803G>A	p.Asp935Asn	3	0.000596	Reported VUS	0.0280801
BRCA2	c.4258G>T	p.Asp1420Tyr	5	0.00677	Reported VUS	0.852183
BRCA2	c.4681C>A	p.His1561Asn	3	0.000885	Reported VUS	0.0726865
BRCA2	c.5640T>G	p.Asn1880Lys	2	0.000942	Reported VUS	0.270682
BRCA2	c.5744C>T	p.Thr1915Met	24	0.0179	Reported VUS	0.166361
BRCA2	c.6100C>T	p.Arg2034Cys	4	0.00307	Reported VUS	0.420775
BRCA2	c.6323G>A	p.Arg2108His	3	0.00127	Reported VUS	0.160829
BRCA2	c.6347A>G	p.His2116Arg	2	0.00136	Reported VUS	0.432334
BRCA2	c.6412G>T	p.Val2138Phe	3	0.00105	Reported VUS	0.106992
BRCA2	c.7017G>C	p.Lys2339Asn	3	0.00238	Reported VUS	0.471347
BRCA2	c.7313A>G	p.Asp2438Gly	2	NA	Reported VUS	NA
BRCA2	c.7397T>C	p.Val2466Ala	538	0.994	Reported VUS	0.304251
BRCA2	c.7469T>C	p.Ile2490Thr	3	0.0175	Reported VUS	0.999999
BRCA2	c.7544C>T	p.Thr2515Ile	3	0.000614	Reported VUS	0.0301749
BRCA2	c.8182G>A	p.Val2728Ile	6	0.0021	Reported VUS	0.0282059
BRCA2	c.8567A>C	p.Glu2856Ala	2	0.00113	Reported VUS	0.343141
BRCA2	c.865A>C	p.Asn289His	43	0.0495	Reported VUS	0.892423
BRCA2	c.8830A>T	p.Ile2944Phe	3	0.00377	Reported VUS	0.770182
BRCA2	c.8851G>A	p.Ala2951Thr	6	0.00899	Reported VUS	0.920178
BRCA2	c.9730G>A	p.Val3244Ile	3	0.00239	Reported VUS	0.474285
BRCA2	c.9836T>C	p.Leu3279Ser	4	NA	Reported VUS	NA
BRCA2	c.9976A>T	p.Lys3326*	12	0.00644	Reported VUS	0.0501545
BRCA2	c.13T>G	p.Ser5Ala	11	NA	Novel VUS	NA
BRCA2	c.2159A>C	p.Asp720Ala	4	NA	Novel VUS	NA
BRCA2	c.2932A>G	p.Asn978Asp	18	NA	Novel VUS	NA
BRCA2	c.4015A>G	p.Ser1339Gly	2	NA	Novel VUS	NA
BRCA2	c.5320C>A	p.Pro1774Thr	6	NA	Novel VUS	NA
BRCA2	c.62A>C	p.Lys21Thr	2	NA	Novel VUS	NA
BRCA2	c.6358T>G	p.Ser2120Ala	3	NA	Novel VUS	NA
BRCA2	c.7458delT	p.Asn2486fs	2	NA	Novel VUS	NA
BRCA2	c.8309_8310insT	p.Glu2772fs	8	NA	Novel VUS	NA
BRCA2	c.9307delA	p.Ile3103fs	6	NA	Novel VUS	NA
BRCA2	c.9837A>T	p.Leu3279Phe	4	NA	Novel VUS	NA

## Sheet: Table S9
Supplemental Table S9: DDR vs. Rest of Cohort (ROC)
Patients Enrolled	ROC (n = 457)	DDR (n = 81)	p-value
Age, years median (IQR)	66 (13)	64 (13)	0.17
Gender, n (%)			0.99
Female	214 (47)	38 (47)
Male	243 (53)	43 (53)
Race, n (%)			0.42
Caucasian	402 (88)	75 (93)
Black	32 (7)	3 (4)
Hispanic	10 (2)	2 (2)
Asian	7 (2)	0 (0)
Native American / Alaskan	1 (0)	1 (1)
Other	5 (1)	0 (0)
Milwaukee resident, n (%)	93 (20)	19 (23)	0.53
Radiographic Stage, n (%)			0.71
Resectable and Borderline	294 (64)	51 (63)
Locally Advanced	94 (21)	15 (18.5)
Metastatic	69 (15)	15 (18.5)
Pre-treatment CEA, ng/ml median (IQR)	3.6 (4.6)	3.1 (4.7)	0.34
CA19-9 producers, n (%)	257 (69)	46 (67)	0.65
Pre-treatment CA19-9, U/ml median (IQR)
All	298 (860)	357 (636)	0.51
Resectable and Borderline	207 (529)	336 (487)	0.19
Locally Advanced	336 (832)	313 (1246)	0.33
Metastatic	944 (3912)	813 (495)	0.28
Treatment modality (excluding 2nd opinion patients)
Resectable and Borderline	ROC (n = 273)	DDR (n = 46)	p-value
Non-surgical treatment (Chemo, XRT, both)	56 (21)	14 (30)	0.13
Surgery +/- additional treatment	217 (79)	32 (70)
Locally Advanced	ROC (n = 70)	DDR (n = 10)	p-value
Non-surgical treatment (Chemo, XRT, both)	38 (54)	5 (50)	0.80
Surgery +/- additional treatment	32 (46)	5 (50)

## Sheet: Table S10
Supplemental Table S10: HDR vs. Rest of Cohort (ROC)
Patients Enrolled	ROC (n = 512)	HDR (n = 26)	p-value
Age, years median (IQR)	65 (13)	66 (14)	0.61
Gender, n (%)			0.64
Female	241 (47)	11 (42)
Male	271 (53)	15 (58)
Race, n (%)			1.00
Caucasian	452 (88)	25 (96)
Black	34 (7)	1 (4)
Hispanic	12 (2)	0 (0)
Asian	7 (1.5)	0 (0)
Native American / Alaskan	2 (0.5)	0 (0)
Other	5 (1)	0 (0)
Milwaukee resident, n (%)	106 (21)	6 (23)	0.77
Radiographic Stage, n (%)			0.37
Resectable and Borderline	328 (64)	17 (65)
Locally Advanced	106 (21)	3 (12)
Metastatic	78 (15)	6 (23)
Pre-treatment CEA, ng/ml median (IQR)	3.6 (4.6)	2.2 (3.9)	0.04
CA19-9 producers, n (%)	287 (69)	16 (64)	0.58
Pre-treatment CA19-9, U/ml median (IQR)
All	321 (842)	320 (630)	0.99
Resectable and Borderline	226 (519)	302 (373)	0.72
Locally Advanced	332 (832)	313 (4689)	0.56
Metastatic	860 (3194)	1519 (2304)	1.00
Treatment modality (excluding 2nd opinion patients)
Resectable and Borderline	ROC (n = 303)	HDR (n = 16)	p-value
Non-surgical treatment (Chemo, XRT, both)	64 (21)	6 (37)	0.12
Surgery +/- additional treatment	239 (79)	10 (63)
Locally Advanced	ROC (n = 78)	HDR (n = 2)	p-value
Non-surgical treatment (Chemo, XRT, both)	42 (54)	1 (50)	1.00
Surgery +/- additional treatment	36 (46)	1 (50)

[truncated: 2 more sheets: Table S11, Table S12]
